# Supplementary material for: Role of Hsp100/Clp Protease Complexes in Controlling the Regulation of Motility in Bacillus subtilis
Source: PubMed Central journal article supplement (PMC4793158; doi:10.3389/fmicb.2016.00315), 2016-03-16
Supplement: DataSheet1.pdf [file DataSheet1.pdf]

1 **Supplementary Tables**

2

3 **Table S1: List of strains**

| Strains               | Relevant genotype/properties             | Source/construction                          |
|-----------------------|------------------------------------------|----------------------------------------------|
| <i>B.subtilis</i> 168 | <i>trpC2</i>                             | (Anagnostopoulos and Spizizen, 1961)         |
| BUG1                  | <i>trpC2 ΔclpP::spec</i>                 | (Gerth et al., 2004)                         |
| BNM103                | <i>trpC2 ΔclpP::spec</i>                 | BUG1 → <i>B. subtilis</i> 168                |
| BNM104                | <i>trpC2 ΔclpP::spec</i>                 | Suppressor mutant obtained from BNM103       |
| QBP418                | PY79 <i>ΔclpC::tet</i>                   | (Pan et al., 2001)                           |
| BNM105                | <i>trpC2 ΔclpC::tet</i>                  | QBP418 → <i>B. subtilis</i> 168              |
| BMM103                | <i>trpC2 ΔclpE::spec</i>                 | (Miethke et al., 2006)                       |
| BNM106                | <i>trpC2 ΔclpE::spec</i>                 | BMM103 → <i>B. subtilis</i> 168              |
| BEK90                 | <i>trpC2 ΔclpX::kan</i>                  | (Gerth et al., 2004)                         |
| BNM107                | <i>trpC2 ΔclpX::kan</i>                  | BEK90 → <i>B. subtilis</i> 168               |
| ORB3834               | <i>trpC2 pheA1 Δspx::kan</i>             | (Nakano et al., 2001)                        |
| BNM109                | <i>trpC2 ΔclpX::tet</i>                  | This work                                    |
| BNM111                | <i>trpC2 Δspx::kan</i>                   | ORB3834 → <i>B. subtilis</i> 168             |
| ORB3838               | <i>trpC2 pheA1 Δspx::kan ΔclpX::spec</i> | (Nakano et al., 2001)                        |
| BNM112                | <i>Δspx::kan ΔclpX::spec</i>             | ORB3838 → <i>B. subtilis</i> 168             |
| BNM126                | <i>trpC2 Δhag</i>                        | pMAD <sub>hag</sub> → <i>B. subtilis</i> 168 |
| NRS1499               | NCIB 3610 <i>ΔdegSU::spec</i>            | N. Stanley-Wall, unpublished                 |
| BNM138                | <i>trpC2 ΔdegSU::spec</i>                | NRS1499 → <i>B. subtilis</i> 168             |

|        |                                                             |                                           |
|--------|-------------------------------------------------------------|-------------------------------------------|
| BNM140 | <i>trpC2 ΔdegSU::spec ΔclpC::tet</i>                        | BNM105/BNM138 → <i>B. subtilis</i> 168    |
| BNM142 | <i>trpC2 ΔdegSU::spec ΔclpX::kan</i>                        | BNM107/BNM138 → <i>B. subtilis</i> 168    |
| PS258  | <i>trpC2 ΔcodY::erm</i>                                     | (Brinsmade and Sonenshein, 2011)          |
| BNM143 | <i>trpC2 ΔcodY::erm</i>                                     | PS258 → <i>B. subtilis</i> 168            |
| BNM147 | <i>trpC2 ΔcodY::erm ΔclpX::kan</i>                          | BNM107 → BNM143                           |
| BNM149 | <i>trpC2 ΔcomK</i>                                          | pMAD <i>comK</i> → <i>B. subtilis</i> 168 |
| BNM150 | <i>trpC2 ΔcomK ΔclpC::tet</i>                               | BNM105 → BNM149                           |
| DS791  | NCIB3610 <i>amyE::PflgB-lacZ cat</i>                        | (Kearns and Losick, 2005)                 |
| BNM301 | <i>trpC2 amyE::PflgB-lacZ cat</i>                           | DS791 → <i>B. subtilis</i> 168            |
| BNM302 | <i>trpC2 amyE::PflgB-lacZ cat<br/>ΔclpP::spec</i>           | BNM103 → BNM301                           |
| BNM303 | <i>trpC2 amyE::PflgB-lacZ cat<br/>ΔclpC::tet</i>            | BNM105 → BNM301                           |
| BNM305 | <i>trpC2 amyE::PflgB-lacZ cat<br/>ΔclpX::kan</i>            | BNM107 → BNM301                           |
| BNM306 | <i>trpC2 amyE::PflgB-lacZ cat<br/>ΔdegSU::spec</i>          | BNM138 → BNM301                           |
| BNM307 | <i>trpC2 amyE::PflgB-lacZ cat<br/>Δspx::kan</i>             | BNM111 → BNM301                           |
| BNM308 | <i>trpC2 amyE::PflgB-lacZ cat<br/>Δspx::kan ΔclpX::spec</i> | BNM112 → BNM301                           |
| BNM309 | <i>trpC2 amyE::PflgB-lacZ cat<br/>ΔcodY::erm</i>            | BNM143 → BNM301                           |
| DS793  | NCIB3610 <i>amyE::Phag-lacZ cat</i>                         | (Kearns and Losick, 2005)                 |
| BNM328 | <i>trpC2 amyE::Phag-lacZ cat</i>                            | DS793 → <i>B. subtilis</i> 168            |
| BNM329 | <i>trpC2 amyE::Phag-lacZ cat<br/>ΔclpP::spec</i>            | BNM103 → BNM328                           |
| BNM330 | <i>trpC2 amyE::Phag-lacZ cat<br/>ΔclpC::tet</i>             | BNM105 → BNM328                           |
| BNM332 | <i>trpC2 amyE::Phag-lacZ cat<br/>ΔclpX::kan</i>             | BNM107 → BNM328                           |

|        |                                                                                         |                                                                  |
|--------|-----------------------------------------------------------------------------------------|------------------------------------------------------------------|
| BNM333 | <i>trpC2 amyE::Phag-lacZ cat</i><br><i>ΔdegSU::spec</i>                                 | BNM138 → BNM328                                                  |
| BNM334 | <i>trpC2 amyE::Phag-lacZ cat</i><br><i>Δspx::kan</i>                                    | BNM111 → BNM328                                                  |
| BNM335 | <i>trpC2 amyE::Phag-lacZ cat</i><br><i>Δspx::kan ΔclpX::spec</i>                        | BNM112 → BNM328                                                  |
| BNM336 | <i>trpC2 amyE::Phag-lacZ cat</i><br><i>ΔcodY::erm</i>                                   | BNM143 → BNM328                                                  |
| BNM338 | <i>trpC2 amyE::Phag-lacZ cat</i><br><i>ΔdegSU::spec ΔclpC::tet</i>                      | BNM138 → BNM328                                                  |
| BNM339 | <i>trpC2 amyE::Phag-lacZ cat</i><br><i>ΔdegSU::spec ΔclpX::kan</i>                      | BNM138/BNM107 → BNM328                                           |
| BNM341 | <i>trpC2 amyE::PflgB-lacZ cat</i><br><i>ΔdegSU::spec ΔclpC::tet</i>                     | BNM138/BNM105 → BNM301                                           |
| BNM343 | <i>trpC2 amyE::Phag-lacZ cat</i><br><i>ΔcodY::erm ΔclpX::kan</i>                        | BNM107 → BNM336                                                  |
| BNM346 | <i>trpC2 amyE::flgB152p-lacZ cat</i>                                                    | <i>pflgB152</i> → <i>B. subtilis</i> 168                         |
| BNM347 | <i>trpC2 amyE::flgB152p-lacZ cat</i><br><i>ΔdegSU::spec</i>                             | BNM138 → BNM346                                                  |
| BNM348 | <i>trpC2 amyE::flgB152p-lacZ cat</i><br><i>ΔclpC::tet</i>                               | BNM105 → BNM346                                                  |
| BNM349 | <i>trpC2 amyE::flgB152p-lacZ cat</i><br><i>ΔdegSU::spec ΔclpC::tet</i>                  | BNM105/BNM138 → BNM346                                           |
| BNM350 | <i>trpC2 Δspx::kan</i><br><i>amyE::P<sub>hyperspank(Hy)</sub>-spx spec</i>              | <i>pMMN521</i> → <i>B. subtilis</i> 168<br>(Nakano et al., 2003) |
| BNM351 | <i>trpC2 Δspx::kan</i><br><i>amyE::P<sub>hyperspank(Hy)</sub>-spx<sup>DD</sup> spec</i> | <i>pSN56</i> → BNM111<br>(Nakano et al., 2003)                   |
| BNM421 | <i>trpC2 Δhag amyE::P<sub>xyl</sub>-hag1 cat</i>                                        | <i>pXhag1</i> → BNM126                                           |
| BNM422 | <i>trpC2 Δhag amyE::P<sub>xyl</sub>-hag1 cat</i><br><i>ΔclpP::spec</i>                  | BNM103 → BNM421                                                  |
| BNM423 | <i>trpC2 Δhag amyE::P<sub>xyl</sub>-hag1 cat</i><br><i>ΔclpC::tet</i>                   | BNM105 → BNM421                                                  |
| BNM424 | <i>trpC2 Δhag amyE::P<sub>xyl</sub>-hag1 cat</i><br><i>ΔclpE::spec</i>                  | BNM106 → BNM421                                                  |
| BNM425 | <i>trpC2 Δhag amyE::P<sub>xyl</sub>-hag1 cat</i><br><i>ΔclpX::kan</i>                   | BNM107 → BNM421                                                  |
| BNM426 | <i>trpC2 Δhag amyE::P<sub>xyl</sub>-hag4 cat</i>                                        | <i>pXhag4</i> → BNM126                                           |

|                                          |                                                                                                                  |                                                             |
|------------------------------------------|------------------------------------------------------------------------------------------------------------------|-------------------------------------------------------------|
| BNM427                                   | <i>trpC2 Δhag amyE::P<sub>xyI</sub>-hag4 cat ΔclpP::spec</i>                                                     | BNM103 → BNM426                                             |
| BNM428                                   | <i>trpC2 Δhag amyE::P<sub>xyI</sub>-hag4 cat ΔclpC::tet</i>                                                      | BNM105 → BNM426                                             |
| BNM429                                   | <i>trpC2 Δhag amyE::P<sub>xyI</sub>-hag4 cat ΔclpE::spec</i>                                                     | BNM106 → BNM426                                             |
| BNM430                                   | <i>trpC2 Δhag amyE::P<sub>xyI</sub>-hag4 cat ΔclpX::kan</i>                                                      | BNM107 → BNM426                                             |
| BNM436                                   | <i>trpC2 Δhag amyE::P<sub>xyI</sub>-hag4 cat Δspx::kan</i>                                                       | BNM111 → BNM426                                             |
| BNM437                                   | <i>trpC2 Δhag amyE::P<sub>xyI</sub>-hag4 cat Δspx::kan ΔclpX::spec</i>                                           | BNM112 → BNM426                                             |
| BNM810                                   | <i>trpC2 amyE::P<sub>hyperspank(Hy)</sub>-spx<sup>DD</sup> spec</i>                                              | pSN56 → BNM101<br>(Nakano et al., 2003)                     |
| BNM834                                   | <i>trpC2 amyE::P<sub>f1gB</sub>-lacZ cat ΔcodY::erm ΔclpX::kan</i>                                               | BNM107 → BNM309                                             |
| BNM840                                   | <i>trpC2 ΔcodY::erm ΔclpX::kan</i>                                                                               | BNM107 → BNM143                                             |
| BNM844                                   | <i>trpC2 amyE::P<sub>hyperspank(Hy)</sub>-spx<sup>DD</sup> spec ΔcodY::erm</i>                                   | BNM143 → BNM810                                             |
| LUW272                                   | <i>trpC2 ΔyjbH::spec</i>                                                                                         | (Rogstam et al., 2007)                                      |
| BNM855                                   | <i>trpC2 ΔyjbH::spec</i>                                                                                         | LUW272 → BNM101                                             |
| BNM857                                   | <i>trpC2 ΔyjbH::spec Δspx::kan</i>                                                                               | BNM855 → BNM111                                             |
| ABH282                                   | <i>PY79 ywrK::Tn917::amyE::cat</i>                                                                               | pAH120 → <i>B. subtilis</i> PY79<br>(Camp and Losick, 2009) |
| BNM860                                   | <i>trpC2 ywrK::Tn917::amyE::cat</i>                                                                              | ABH282 → BNM101                                             |
| BNM866                                   | <i>trpC2 ywrK::Tn917::amyE::P<sub>hyperspank(Hy)</sub>-spx<sup>DD</sup> spec</i>                                 | pSN56 → BNM860                                              |
| BNM878                                   | <i>trpC2 ywrK::Tn917::amyE::P<sub>hyperspank(Hy)</sub>-spx<sup>DD</sup> spec amyE::P<sub>f1gB</sub>-lacZ cat</i> | BNM301 → BNM866                                             |
| BNM1001                                  | <i>trpC2 ywrK::Tn917::amyE::P<sub>hyperspank(Hy)</sub>-spx<sup>DD</sup> spec amyE::Phag-lacZ cat</i>             | BNM328 → BNM866                                             |
| <i>swrA<sup>+</sup> degQ<sup>+</sup></i> | <i>trpC2 sacA::swrA cat thrC::degQ kan</i>                                                                       | Gift of Nicola Stanley-Wall<br>Jörn Hoßmann, Diploma thesis |
| BNM1266                                  | <i>trpC2 sacA::swrA cat thrC::degQ kan ΔclpC::tet</i>                                                            | BNM105 → <i>swrA<sup>+</sup> degQ<sup>+</sup></i>           |

|                                         |                                                                                                                |                                                   |
|-----------------------------------------|----------------------------------------------------------------------------------------------------------------|---------------------------------------------------|
| BNM1268                                 | <i>trpC2 sacA::swrA cat thrC::degQ kan ΔclpP::spec</i>                                                         | BNM103 → <i>swrA<sup>+</sup> degQ<sup>+</sup></i> |
| BNM1270                                 | <i>trpC2 sacA::swrA cat thrC::degQ kan ΔclpX::tet</i>                                                          | BNM109 → <i>swrA<sup>+</sup> degQ<sup>+</sup></i> |
| DK1042                                  | NCIB3610 <i>comIQ12L</i>                                                                                       | BGSC (Lab of Dan Kearns)                          |
| BHS122                                  | NCIB3610 <i>comIQ12L ΔclpC::tet</i>                                                                            | BNM105 → DK1042                                   |
| BHS123                                  | NCIB3610 <i>comI-Q12L ΔclpX::kan</i>                                                                           | BNM107 → DK1042                                   |
| <i>E. coli</i> XL1-blue competent cells | <i>recA1 endA1 gyrA96 thi-1 hsdR17 supE44 relA1 lac [F proAB lacI<sup>f</sup> ZM15 Tn10 (Tet<sup>r</sup>)]</i> | Stratagene                                        |
| <i>E. coli</i> FI1202                   | <i>lacI<sup>f</sup> lacL8 gln5::Tn5 1202</i>                                                                   | (Fiedler and Weiss, 1995)                         |

4

5

**Table S2: List of plasmids**

| Plasmid           | Construction                                                                    | Reference                  |
|-------------------|---------------------------------------------------------------------------------|----------------------------|
| pQE60             | C-terminal His <sub>6</sub> -tag fusion                                         | Qiagen                     |
| pQE60- <i>hag</i> | <i>hag</i> in <i>NcoI/BamHI</i> of pQE60                                        | This work                  |
| pQE60- <i>spx</i> | <i>spx</i> in <i>NcoI/BamHI</i> of pQE60                                        | This work                  |
| pDG268            | Vector for transcriptional <i>lacZ</i> fusion                                   | (Antoniewski et al., 1990) |
| p <i>flgB152</i>  | <i>flgB152</i> fragment in <i>EcoRI/BamHI</i> of pDG268                         | This work                  |
| pMAD              | Vector for markerless deletions                                                 | (Arnaud et al., 2004)      |
| pMAD- <i>hag</i>  | <i>hag</i> flanking regions in <i>BamHI/NcoI</i> of pMAD                        | (Blair et al., 2008)       |
| pMAD- <i>comK</i> | <i>comK</i> flanking regions in <i>BamHI/NcoI</i> of pMAD                       | This work                  |
| pMMN521           | P <sub>hyperspank(Hy)</sub> - <i>spx</i> for <i>amyE</i> insertion              | (Nakano et al., 2003)      |
| pSN56             | P <sub>hyperspank(Hy)</sub> - <i>spx<sup>DD</sup></i> for <i>amyE</i> insertion | (Nakano et al., 2003)      |
| pX                | Expression from P <sub>xyl</sub> in <i>amyE</i>                                 | (Kim et al., 1996)         |
| pX- <i>hagI</i>   | <i>hagI</i> fragment in <i>BamHI</i> of pX                                      | This work                  |

|                 |                                             |           |
|-----------------|---------------------------------------------|-----------|
| pX- <i>hag4</i> | <i>hag4</i> fragment in <i>Bam</i> HI of pX | This work |
|-----------------|---------------------------------------------|-----------|

6

7

8 **References**

9

- 10 Anagnostopoulos, C., and Spizizen, J. (1961). Requirements for Transformation in *Bacillus subtilis*. *J.*  
11 *Bacteriol.* 81, 741–746.
- 12 Antoniewski, C., Savelli, B., and Stragier, P. (1990). The *spoIIj* gene, which regulates early  
13 developmental steps in *Bacillus subtilis*, belongs to a class of environmentally responsive  
14 genes. *J. Bacteriol.* 172, 86–93.
- 15 Arnaud, M., Chastanet, A., and Débarbouillé, M. (2004). New vector for efficient allelic replacement in  
16 naturally nontransformable, low-GC-content, gram-positive bacteria. *Appl. Environ.*  
17 *Microbiol.* 70, 6887–6891. doi:10.1128/AEM.70.11.6887-6891.2004.
- 18 Blair, K. M., Turner, L., Winkelman, J. T., Berg, H. C., and Kearns, D. B. (2008). A molecular clutch  
19 disables flagella in the *Bacillus subtilis* biofilm. *Science* 320, 1636–1638.  
20 doi:10.1126/science.1157877.
- 21 Brinsmade, S. R., and Sonenshein, A. L. (2011). Dissecting complex metabolic integration provides  
22 direct genetic evidence for CodY activation by guanine nucleotides. *J. Bacteriol.* 193, 5637–  
23 5648. doi:10.1128/JB.05510-11.
- 24 Camp, A. H., and Losick, R. (2009). A feeding tube model for activation of a cell-specific transcription  
25 factor during sporulation in *Bacillus subtilis*. *Genes Dev.* 23, 1014–1024.  
26 doi:10.1101/gad.1781709.
- 27 Fiedler, U., and Weiss, V. (1995). A common switch in activation of the response regulators NtrC and  
28 PhoB: phosphorylation induces dimerization of the receiver modules. *EMBO J.* 14, 3696–  
29 3705.
- 30 Gerth, U., Kirstein, J., Mostertz, J., Waldminghaus, T., Miethke, M., Kock, H., et al. (2004). Fine-tuning in  
31 regulation of Clp protein content in *Bacillus subtilis*. *J. Bacteriol.* 186, 179–191.
- 32 Kearns, D. B., and Losick, R. (2005). Cell population heterogeneity during growth of *Bacillus subtilis*.  
33 *Genes Dev.* 19, 3083–3094. doi:10.1101/gad.1373905.
- 34 Kim, L., Mogk, A., and Schumann, W. (1996). A xylose-inducible *Bacillus subtilis* integration vector and  
35 its application. *Gene* 181, 71–76.
- 36 Miethke, M., Hecker, M., and Gerth, U. (2006). Involvement of *Bacillus subtilis* ClpE in CtsR  
37 degradation and protein quality control. *J. Bacteriol.* 188, 4610–4619. doi:10.1128/JB.00287-  
38 06.
- 39 Nakano, M. M., Hajarizadeh, F., Zhu, Y., and Zuber, P. (2001). Loss-of-function mutations in *yjbD* result  
40 in ClpX- and ClpP-independent competence development of *Bacillus subtilis*. *Mol. Microbiol.*  
41 42, 383–394.
- 42 Nakano, S., Küster-Schöck, E., Grossman, A. D., and Zuber, P. (2003). Spx-dependent global  
43 transcriptional control is induced by thiol-specific oxidative stress in *Bacillus subtilis*. *Proc.*  
44 *Natl. Acad. Sci. U. S. A.* 100, 13603–13608. doi:10.1073/pnas.2235180100.

45 Pan, Q., Garsin, D. A., and Losick, R. (2001). Self-reinforcing activation of a cell-specific transcription  
 46 factor by proteolysis of an anti-sigma factor in *B. subtilis*. *Mol. Cell* 8, 873–883.

47 Rogstam, A., Larsson, J. T., Kjelgaard, P., and von Wachenfeldt, C. (2007). Mechanisms of adaptation to  
 48 nitrosative stress in *Bacillus subtilis*. *J. Bacteriol.* 189, 3063–3071. doi:10.1128/JB.01782-06.

49  
 50  
 51  
 52

**Table S3: List of primers**

| Primer                | Sequence                                          |
|-----------------------|---------------------------------------------------|
| PhagQE60–for          | catg <b>ccatgg</b> tgagaattaaccacaatattgcagcg     |
| PhagQE60–rev          | gg <b>gatcc</b> acgtaataattgaagtacgttttgc         |
| spxpQE60–for          | ggagtgaagat <b>ccatgg</b> ttacac                  |
| spxpQE60–rev          | gatacgat <b>ggatcc</b> gtttgccaaacgc              |
| hag1–for              | ccc <b>ggatcc</b> atgagaattaaccacaatattgc         |
| hag1–rev              | ccc <b>ggatcc</b> taacgtaataattgaagtacgttttgc     |
| hag4–for              | ccc <b>ggatcc</b> tgtagccggaggaggcgca             |
| hag4–rev              | cccc <b>ggatcc</b> agaccctggcaacgccaagg           |
| flgB152–for           | ggaattc <b>ttgctgacc</b> gtgctcggcattac           |
| flgB152–rev           | c <b>gggatcc</b> gcgatattattagttatgac             |
| flgB (-209 to -6)–for | ggaattcatttttgatttttcttcaaaaag                    |
| flgB (-209 to -6)–rev | cgggatcctatttgaagaataaacaggc                      |
| flgB (-106 to 98)–for | ggaattcctaacaatctaggactttatac                     |
| flgB (-106 to 98)–rev | cgggatcccaagattttgtatcgt                          |
| flgB (-1 to 203)–for  | ggaattctatagttttacaattctcgac                      |
| flgB (-1 to 203)–rev  | cgggatccaattttggaaagagactttttttg                  |
| hag–probe–for         | attgaaagttggtgatgaag                              |
| clpXtetP1             | agtgacattccctgaggag                               |
| clpXtetP2             | gaacaacctgcattgcaagatctttcacccttaatcttg           |
| clpXtetP3             | ttgatccttttttataacaggaattcagataagcacaacct<br>cctg |
| clpXtetP4             | tttggcattctcgtggtcgcg                             |

53  
 54  
 55  
 56  
 57  
 58  
 59  
 60  
 61  
 62

## 63 **Supplementary Figure Legends**

64

### 65 **Fig S1 in vivo stability of Hag**

66 *B. subtilis* wild type cells were grown in Belitsky minimal medium and pulse labeled  
67 with 25  $\mu\text{Ci}$   $^{35}\text{S}$ -methionine for 10 minutes. Samples were TCA-precipitated and  
68 immunoprecipitation was performed with Hag-specific antibodies and protein A-coated  
69 magnetic beads. Samples were separated by SDS-PAGE (12.5 %) and subjected to  
70 autoradiography.

71

### 72 **Fig S2 Northern blot analysis of flagellar transcripts in wild type and *clp* mutant** 73 **cells.**

74 Northern blot using total RNA of the wild type and strains BNM126 ( $\Delta\text{hag}$ ), BNM103  
75 ( $\Delta\text{clpP}$ ), BNM105 ( $\Delta\text{clpC}$ ), BNM106 ( $\Delta\text{clpE}$ ) and BNM107 ( $\Delta\text{clpX}$ ) grown to  $\text{OD}_{600}$  1.0  
76 at 37 °C in LB medium. 200 ng total RNA were separated by gel electrophoresis and  
77 blotted on nylon membranes. The RNA was hybridized to a digoxigenin (DIG)-labeled  
78 DNA probe against *hag*, and developed using anti-digoxigenin antibodies conjugated to  
79 alkaline phosphatase. Antibodies were detected using CDP-Star (Roche Applied  
80 Sciences). M: 100 ng DIG-labeled RNA Molecular Weight Marker III (Roche Applied  
81 Sciences).

82

### 83 **Fig S3 Uncoupling *hag* expression from flagellar regulation.**

84 (A) Hag Western blot analysis of strain BNM421 (WT), BNM422 ( $\Delta\text{clpP}$ ), BNM423  
85 ( $\Delta\text{clpC}$ ), BNM424 ( $\Delta\text{clpE}$ ) and BNM425 ( $\Delta\text{clpX}$ ), carrying a xylose-inducible copy of  
86 *hag* at the *amyE* locus. Cells were grown to OD 1.0 at 37 °C in LB medium with 2 % w/v  
87 xylose (+) or in the absence of xylose (-). Cells were lysed by lysozyme treatment and  
88 boiling in SDS sample buffer (see Materials and Methods). (B) Same as A for strains  
89 BNM426 (WT), BNM427 ( $\Delta\text{clpP}$ ), BNM428 ( $\Delta\text{clpC}$ ), BNM429 ( $\Delta\text{clpE}$ ) and BNM430  
90 ( $\Delta\text{clpX}$ ), in which the *hag* coding region along with the untranslated regions is expressed  
91 under the control of the  $P_{\text{xyI}}$  promoter. (C) Motility assay of strains BNM426 (WT),  
92 BNM427 ( $\Delta\text{clpP}$ ), BNM428 ( $\Delta\text{clpC}$ ), BNM429 ( $\Delta\text{clpE}$ ) and BNM430 ( $\Delta\text{clpX}$ ) in the  
93 absence (left) or presence (right) of 2 % w/v xylose. (D) Hag Western blots of strains  
94 BNM426 (WT), BNM430 ( $\Delta\text{clpX}$ ), BNM436 ( $\Delta\text{spx}$ ) and BNM437 ( $\Delta\text{spx}$   $\Delta\text{clpX}$ ), induced  
95 with 2 % w/v xylose.

96

### 97 **Fig S4 *clpC* affects swimming motility and Hag levels via *comK*.**

98 (A) Motility assay of *B. subtilis* wild type and  $\Delta\text{clpC}::\text{tet}$  (BNM105),  $\Delta\text{comK}$  (BNM149),  
99 and  $\Delta\text{clpC}::\text{tet}$   $\Delta\text{comK}$  (BNM150). (B) Cells of the indicated strains (as in A) were grown  
100 to  $\text{OD}_{600}$  1.0 at 37 °C. Cell lysates were analyzed by SDS-PAGE and Western blotting  
101 using anti-Hag antibodies.

102

### 103 **Fig S5 DegU levels in wild type and *clp* mutant cells.**

104 The wild type and strains BNM103 ( $\Delta\text{clpP}$ ), BNM105 ( $\Delta\text{clpC}$ ), BNM106 ( $\Delta\text{clpE}$ ),  
105 BNM107 ( $\Delta\text{clpX}$ ) and BNM138 ( $\Delta\text{degSU}$ ) were grown in LB medium at 37 °C to T-1  
106 (one hour prior to entry into stationary phase, A), T0 (time of entry into stationary phase,  
107 B), T2 (C), T3 (D) and T4 (E), protoplasts were prepared and lysed (see Materials &



108 Methods). Lysates were separated by SDS–PAGE and subjected to Western blot analysis  
109 using polyclonal DegU antibodies (upper panels) or HtpG antibodies as a loading control  
110 (lower panels). Band intensities were normalized by calculating the ratio between the  
111 DegU signal and the HtpG signal and subsequently normalized to wild type levels of each  
112 time point.

113

114 **Fig S6 The influence of *clpX* acts on motility independently of *degU*.**

115 (A) Motility assay of the wild type and strains BNM107 ( $\Delta clpX$ ), BNM138 ( $\Delta degSU$ ),  
116 and BNM140 ( $\Delta degSU \Delta clpX$ ). (B)  $\beta$ –galactosidase assay of the indicated strains  
117 carrying a *Phag–lacZ* fusion. Circles: wild type 168, triangles:  $\Delta clpX::kan$  (BNM305),  
118 diamonds:  $\Delta degSU::spec$  (BNM333), inverted triangles:  $\Delta degSU::spec \Delta clpX::kan$   
119 (BNM339). Results from one representative experiment are depicted.

120

121 **Fig S7 Clp proteases influence motility independently of *codY*.**

122 (A) CodY Western blot of lysates from the wild type and strains BNM103 ( $\Delta clpP$ ),  
123 BNM105 ( $\Delta clpC$ ), BNM106 ( $\Delta clpE$ ) and BNM107 ( $\Delta clpX$ ) grown to OD<sub>600</sub> 1.0 at 37 °C  
124 in LB medium. (B) Motility assay of the wild type and strains BNM107 ( $\Delta clpX::kan$ ),  
125 BNM143 ( $\Delta codY::erm$ ) and BNM147 ( $\Delta codY::erm \Delta clpX::kan$ ). (C) Hag Western blot  
126 analysis, strains as in (A). (D)  $\beta$ –galactosidase assays of strains carrying a *PflgB–lacZ*  
127 fusion.  $\Delta clpX::kan$  (BNM305, triangles),  $\Delta codY::erm$  (BNM309, diamonds) and  
128  $\Delta codY::erm \Delta clpX::kan$  (BNM834, inverted triangles). Results from one representative  
129 experiment are shown. (E) Same as (D) for the *Phag–lacZ* fusion. Circles: wild type 168  
130 (BNM328), triangles:  $\Delta codY::erm$  (BNM336) diamonds:  $\Delta clpX::kan$  (BNM332),  
131 inverted triangles:  $\Delta codY::erm \Delta clpX::kan$  (BNM343).

132

133 **FigG S8 A *clpP* suppressor mutant restores motility and Hag levels.**

134 (A) Growth curves in LB medium at 37 °C of the *B. subtilis* wild type (circles), freshly  
135 transformed  $\Delta clpP::spec$  mutant (BNM103, squares) and from a  $\Delta clpP::spec$  suppressor  
136 mutant (BNM104, triangles). (B) Motility assay of the indicated strains (as in A). (C)  
137 Hag Western blot of the wild type and strain BNM104 ( $\Delta clpP$  sup, upper panel) and Spx  
138 Western blot of the wild type, strain BNM104 ( $\Delta clpP$  sup), and strain BNM103  
139 ( $\Delta clpP::spec$ ).

140

141 **Fig S9 Production of Spx<sup>DD</sup> reduces *hag* mRNA levels and Hag protein levels.**

142 (A) Northern blot analysis of samples from strain BNM351 ( $\Delta spx::kan amyE::P_{Hy-}$   
143  $spx^{DD}$ ) induced with 1 mM IPTG as indicated. Blots were hybridized with DIG–labeled  
144 *hag* probe. (B) Western blot analysis of samples from strains BNM350 ( $\Delta spx::kan$   
145  $amyE::P_{Hy-spx}$ ) and BNM351 ( $\Delta spx::kan amyE::P_{Hy-spx}^{DD}$ ) induced with 1 mM IPTG  
146 using Spx and Hag antibodies.

147

148 **Fig S10 YjbH influences swimming motility and Hag levels.**

149 (A) Motility assay of the wild type and strains BNM111 ( $\Delta spx$ ), BNM855 ( $\Delta yjbH$ ) and  
150 BNM857 ( $\Delta spx \Delta yjbH$ ). (B) Hag Western blot analysis. Strains as in (A).

151

152 **Fig S11 Electrophoretic mobility shift assay using purified Spx and *fla/che* promoter**  
153 **DNA fragments.**

154 Gelshift experiments using different *PflgB* fragments (A: -209 to -6, B: -106 to 98, C: -1  
155 to 203 relative to the *flgB* transcription start site) and purified Spx-His<sub>6</sub> (0, 1.25, 2.5 or  
156 5 μM) were performed in the presence of poly-d-IC under oxidizing (1 mM diamide,  
157 left) and reducing conditions (5 mM DTT, right).

158

159 **Fig S12 Influence of *clpC* and *clpX* mutations on swimming motility of *B. subtilis***  
160 **strains carrying the *swrA*<sup>+</sup> and *degQ*<sup>+</sup> alleles.** (A) Swimming plate with the indicated

161 complemented *B. subtilis* 168 strains. (The plate was inoculated with 3 μl of a growing  
162 culture (OD<sub>600</sub> of 1) and incubated for 7 h at 37 °C and o/n at room temperature) (B) A  
163 Western Blot (with anti Hag and anti HtpG serum) of extracts prepared from indicated *B.*  
164 *subtilis* strains (OD<sub>600</sub> 0,9-1,1) 5 μg total protein was loaded. (C) Swimming plate of the  
165 wild type NCIB 3610 strain and the respective *clpC* and *clpX* mutant.

166

167

168

169
